# Supplementary material for: Hyperbaric oxygen facilitates teniposide-induced cGAS-STING activation to enhance the antitumor efficacy of PD-1 antibody in HCC
Source: PubMed Central journal article supplement — J Immunother Cancer. 2022 Aug 24;10(8):e004006. doi: 10.1136/jitc-2021-004006 (PMC9413187; doi:10.1136/jitc-2021-004006), 2022-08-24
Supplement: jitc-2021-004006supp001.pdf [file jitc-2021-004006supp001.pdf]

## Hyperbaric Oxygen Facilitates Teniposide-induced cGAS-STING Activation to Enhance the Anti-tumor Efficacy of PD-1 Antibody in HCC

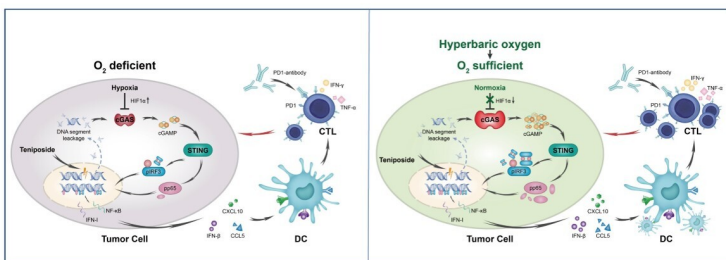

### Authors

Kun Li, Yihang Gong, Dongbo Qiu, Hui Tang, Jian Zhang, Zenan Yuan, Yingqi Huang, Yunfei Qin, Linsen Ye, Yang Yang

### Correspondence

yysysu@163.com

### In Brief

Hyperbaric oxygen facilitates the cGAS-STING axis activation after teniposide chemotherapy in HCC, leading to the stimulation of an immunogenic, T-cell-inflamed tumor microenvironment, further promoting the therapeutic effect of PD-1 immunotherapy.
