# Supplementary material for: Hyperbaric oxygen facilitates teniposide-induced cGAS-STING activation to enhance the antitumor efficacy of PD-1 antibody in HCC
Source: PubMed Central journal article supplement — J Immunother Cancer. 2022 Aug 24;10(8):e004006. doi: 10.1136/jitc-2021-004006 (PMC9413187; doi:10.1136/jitc-2021-004006), 2022-08-24
Supplement: jitc-2021-004006supp002.pdf [file jitc-2021-004006supp002.pdf]

Figure S1

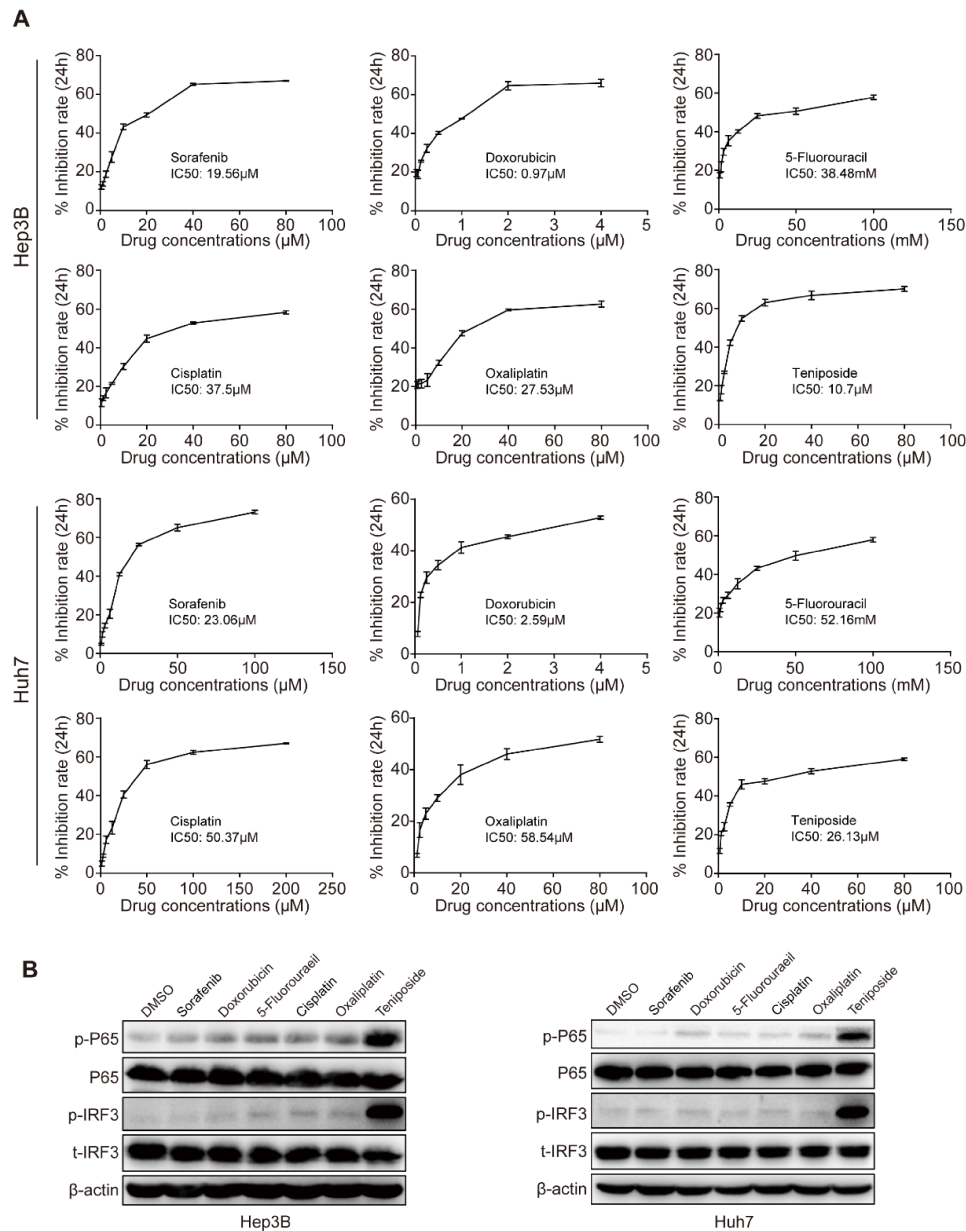

**Figure S1. Teniposide induced stronger p-IRF3 and p-P65 expression in human HCC cells in comparison to the commonly used chemotherapy drug.**

(A) Hep3B and Huh7 cells were treated with sorafenib, doxorubicin, 5-fluorouracil, cisplatin, oxaliplatin or teniposide at serial doubling diluted concentrations for 24 h, then the inhibition rates were determined by a CCK-8 kit, the 50% inhibitory concentration (IC<sub>50</sub>) values were calculated by graph prism 7. (B) Hep3B and Huh7

cells were treated with sorafenib, doxorubicin, 5-fluorouracil, cisplatin, oxaliplatin or teniposide at each IC50 for 24 h, then the cellular protein expression of p-IRF3 and p-P65 was detected by immunoblotting,  $\beta$ -actin was used as a loading control. Data in **(A)** are shown as mean  $\pm$  SD of 3 independent experiments. Data in **(B)** are representative of 3 independent experiments.
