# Supplementary material for: Hyperbaric oxygen facilitates teniposide-induced cGAS-STING activation to enhance the antitumor efficacy of PD-1 antibody in HCC
Source: PubMed Central journal article supplement — J Immunother Cancer. 2022 Aug 24;10(8):e004006. doi: 10.1136/jitc-2021-004006 (PMC9413187; doi:10.1136/jitc-2021-004006), 2022-08-24
Supplement: jitc-2021-004006supp003.pdf [file jitc-2021-004006supp003.pdf]

## Figure S2

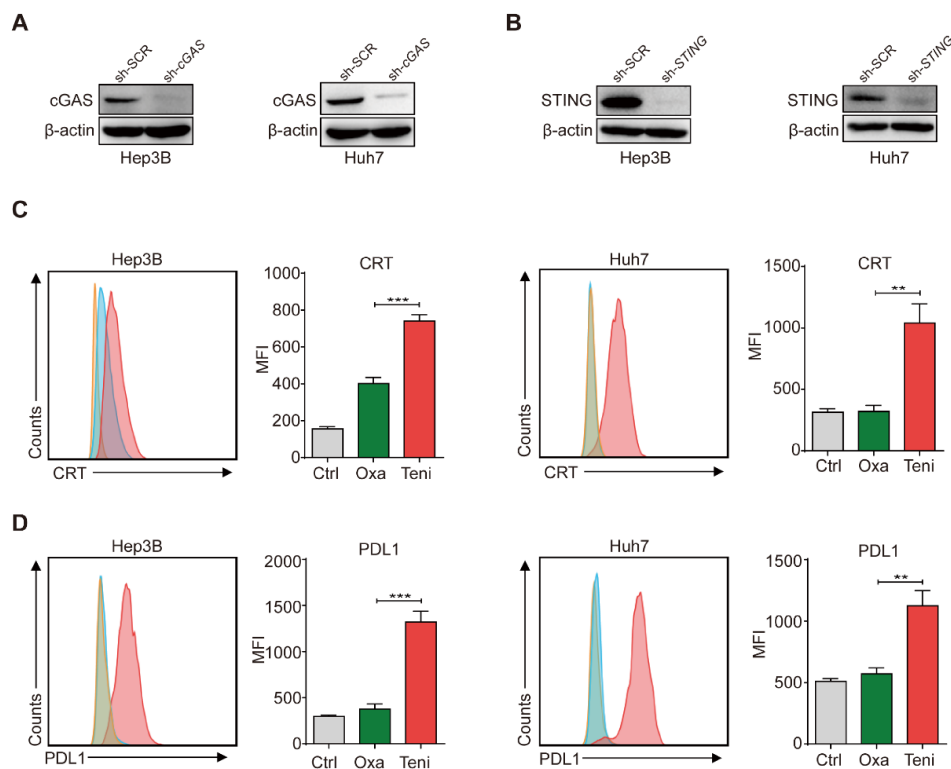

**Figure S2. Teniposide induced stronger ICD biomarkers expression than oxaliplatin in human HCC cells.**

(A) Immunoblotting results verified the knockdown effect of *cGAS* in Hep3B and Huh7 cells. (B) Immunoblotting results verified the knockdown effect of *STING* in Hep3B and Huh7 cells. (C-D) Hep3B and Huh7 cells were treated with oxaliplatin or teniposide at each IC50 for 24 h, then the surface expression of CRT (C) and PDL1 (D) were detected by FACS. CRT: calreticulin; PDL1: programmed cell death ligand 1; MFI: mean fluorescence intensity. Data in (A, B) are representative of 3 independent experiments. Data in (C, D) are shown as mean  $\pm$  SD of 3 independent experiments. \*:P < 0.05, \*\*:P < 0.01 and \*\*\*:P < 0.001.
