# Supplementary material for: Hyperbaric oxygen facilitates teniposide-induced cGAS-STING activation to enhance the antitumor efficacy of PD-1 antibody in HCC
Source: PubMed Central journal article supplement — J Immunother Cancer. 2022 Aug 24;10(8):e004006. doi: 10.1136/jitc-2021-004006 (PMC9413187; doi:10.1136/jitc-2021-004006), 2022-08-24
Supplement: jitc-2021-004006supp004.pdf [file jitc-2021-004006supp004.pdf]

## Figure S3

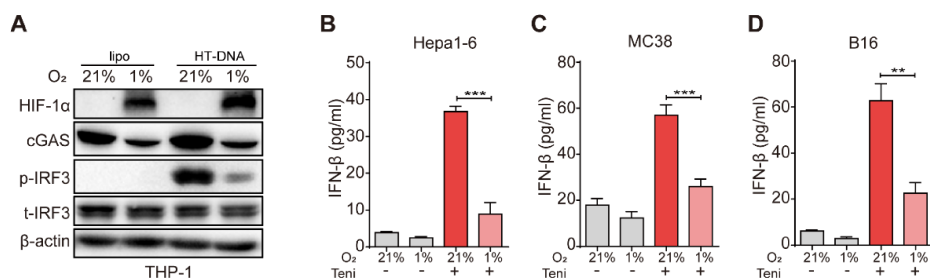

**Figure S3. Hypoxia inhibited cGAS/STING-mediated IFN-I signaling in multiple tumor cell lines.**

(A) THP-1 cells were cultured in normoxic (21% O<sub>2</sub>) or hypoxic (1% O<sub>2</sub>) environment for 18 h, then the cells were transfected with herring testes (HT)-DNA (5 μg/ml), followed by continuous normoxic or hypoxic culture for another 6 h, the protein expression of cGAS and p-IRF3 were detected by immunoblotting, β-actin was used as a loading control. (B-D) Murine tumor cells were treated with teniposide at 20 μM, followed by either normoxic or hypoxic culture for 24 h, then the supernatant IFN-β of Hepa1-6 (B), MC38 (C), B16 (D) cells were measured by ELISA. Data in (A) are representative of 3 independent experiments. Data in (B, C, D) are shown as mean ± SD of 3 independent experiments. \*:P < 0.05, \*\*:P < 0.01 and \*\*\*:P < 0.001.
