# Supplementary material for: Hyperbaric oxygen facilitates teniposide-induced cGAS-STING activation to enhance the antitumor efficacy of PD-1 antibody in HCC
Source: PubMed Central journal article supplement — J Immunother Cancer. 2022 Aug 24;10(8):e004006. doi: 10.1136/jitc-2021-004006 (PMC9413187; doi:10.1136/jitc-2021-004006), 2022-08-24
Supplement: jitc-2021-004006supp005.pdf [file jitc-2021-004006supp005.pdf]

Figure S4

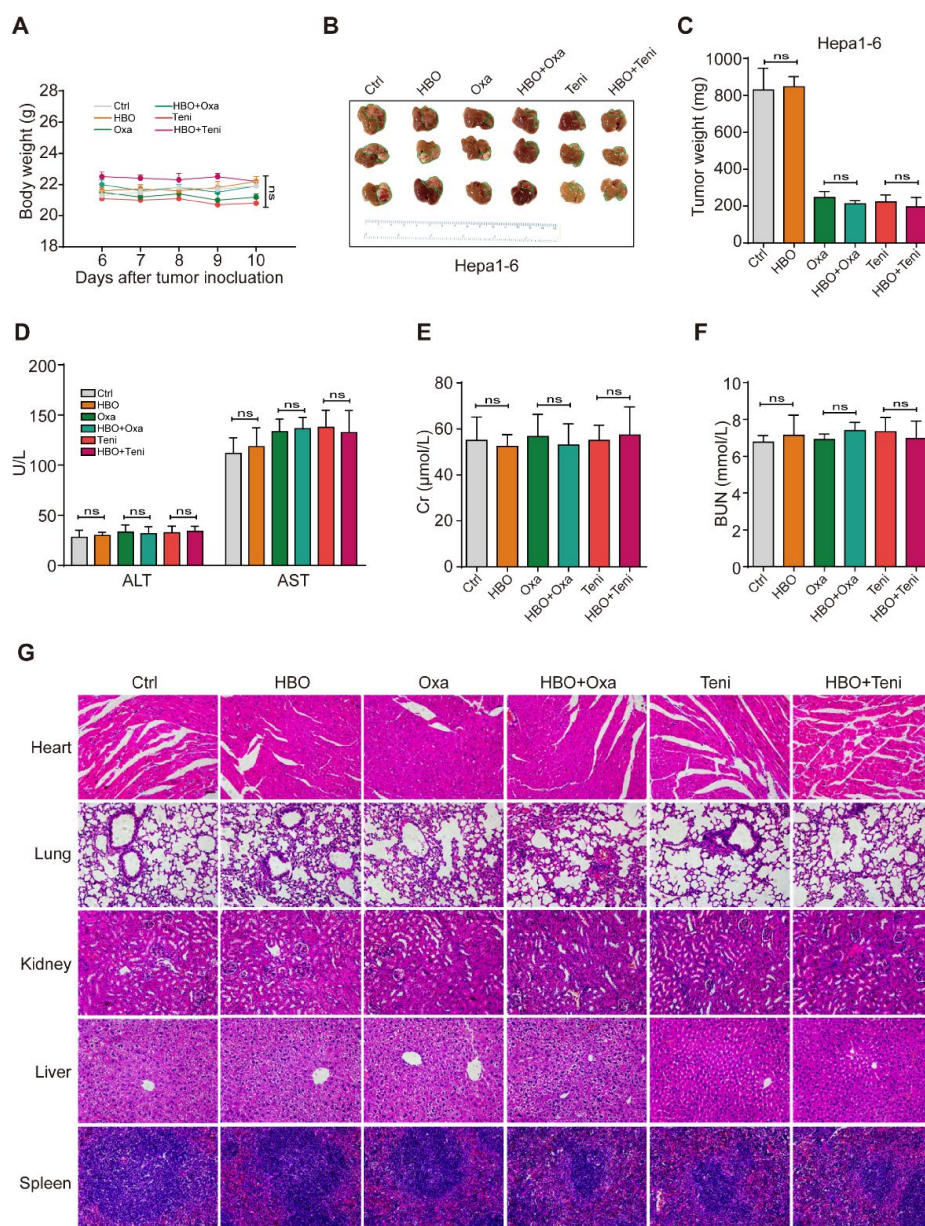

**Figure S4. Safety evaluation of combined HBO therapy with oxaliplatin/teniposide chemotherapy.**

(A) Body weight changes of hepatic tumor-bearing mice during the tumor microenvironment (TME) survey experiments. (B) Representative photos of Hepa1-6 tumor tissue at the end of TME survey experiments (circled by green lines). (C) Orthotopic tumors were resected from liver and weighted at the end of TME survey

experiments. **(D-F)** Serum levels of alanine transaminase (ALT), aspartate aminotransferase (AST) **(D)**, creatinine (Cr) **(E)**, and blood urea nitrogen (BUN) **(F)** in mice were measured at the end of TME survey experiments after treatments withdrawal. **(G)** H&E staining for heart, lung, kidney, liver and spleen from mice in each group at the end of TME survey experiments. Scale bar, 50  $\mu\text{m}$ . \*:P < 0.05, \*\*:P < 0.01 and \*\*\*:P < 0.001. n.s. as not significant. (n=3 per group).
