# Supplementary material for: Hyperbaric oxygen facilitates teniposide-induced cGAS-STING activation to enhance the antitumor efficacy of PD-1 antibody in HCC
Source: PubMed Central journal article supplement — J Immunother Cancer. 2022 Aug 24;10(8):e004006. doi: 10.1136/jitc-2021-004006 (PMC9413187; doi:10.1136/jitc-2021-004006), 2022-08-24
Supplement: jitc-2021-004006supp006.pdf [file jitc-2021-004006supp006.pdf]

Figure S5

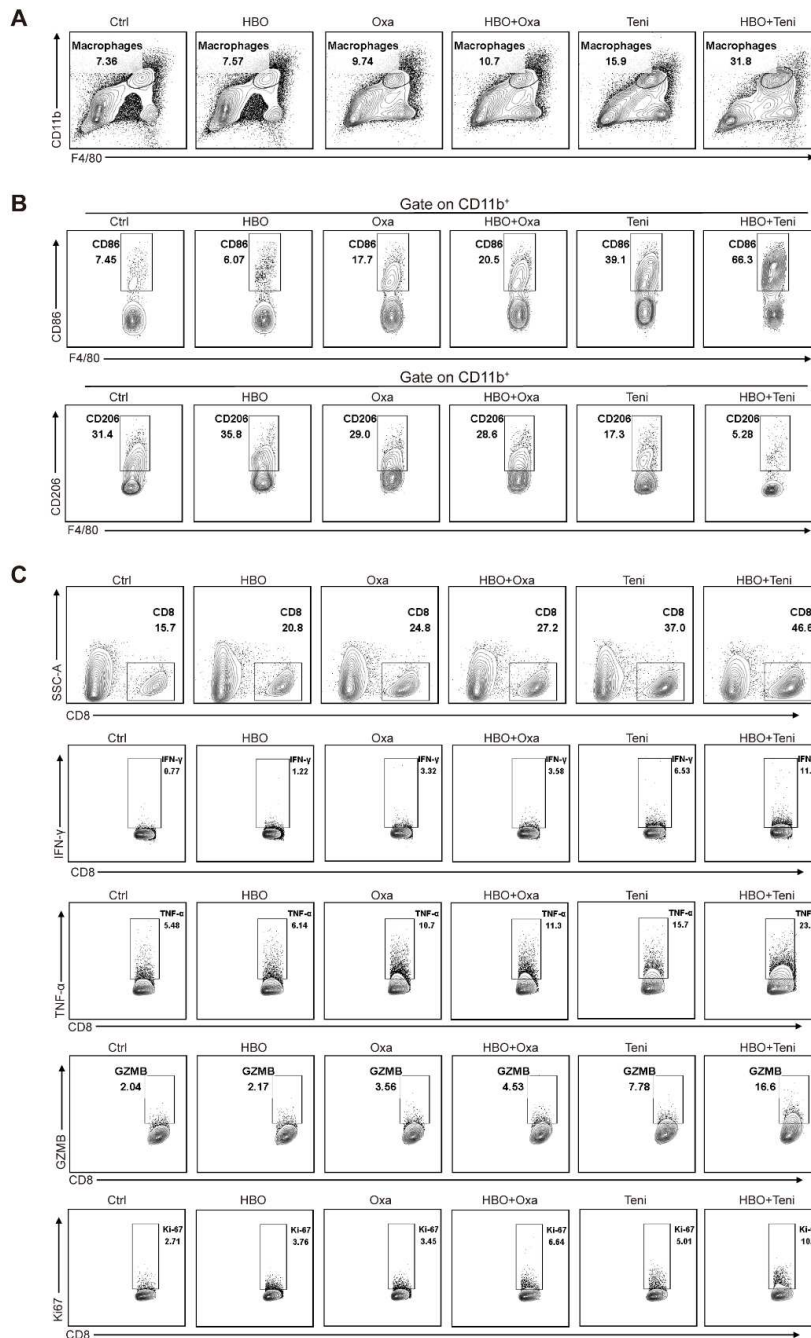

**Figure S5. Representative flow cytometric plots of tumor-infiltrating immune cells.**

(A) Representative flow cytometric plots of macrophages (CD11b<sup>+</sup>F4/80<sup>+</sup>) in tumor tissues. (B) Representative flow cytometric plots of M1-like macrophages (CD11b<sup>+</sup>F4/80<sup>+</sup>CD86<sup>+</sup>) and M2-like macrophages (CD11b<sup>+</sup>F4/80<sup>+</sup>CD206<sup>+</sup>) in tumor

tissues. (C) Representative flow cytometric plots of CD8<sup>+</sup>T cells, IFN- $\gamma$ <sup>+</sup>CD8<sup>+</sup>T cells, TNF- $\alpha$ <sup>+</sup> CD8<sup>+</sup>T cells, GZMB<sup>+</sup>CD8<sup>+</sup>T cells and Ki67<sup>+</sup>CD8<sup>+</sup>T cells in tumor tissues. (n=3 per group). GZMB: granzyme B.
