# Supplementary material for: Hyperbaric oxygen facilitates teniposide-induced cGAS-STING activation to enhance the antitumor efficacy of PD-1 antibody in HCC
Source: PubMed Central journal article supplement — J Immunother Cancer. 2022 Aug 24;10(8):e004006. doi: 10.1136/jitc-2021-004006 (PMC9413187; doi:10.1136/jitc-2021-004006), 2022-08-24
Supplement: jitc-2021-004006supp007.pdf [file jitc-2021-004006supp007.pdf]

**Figure S6**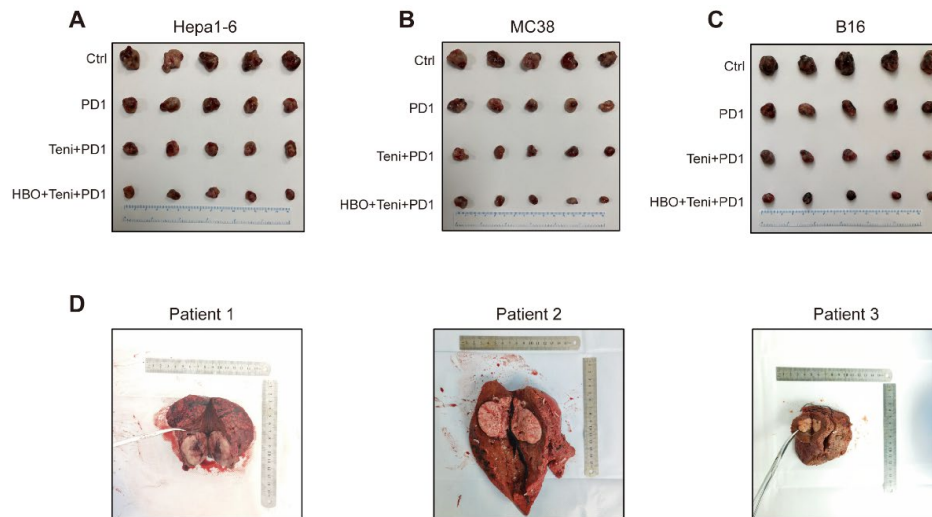

**Figure S6. Representative photos of mice subcutaneous tumor tissues and surgically resected human HCC tissues.**

(A-C) Representative photos of subcutaneous Hepa1-6 (A), MC38 (B), and B16 (C) tumor tissues at the end of anti-PD-1 sensitization experiments. (n=5 per group). (D) Clinical HCC tumor sample images of three different patients used in this study.
