# Supplementary material for: Hyperbaric oxygen facilitates teniposide-induced cGAS-STING activation to enhance the antitumor efficacy of PD-1 antibody in HCC
Source: PubMed Central journal article supplement — J Immunother Cancer. 2022 Aug 24;10(8):e004006. doi: 10.1136/jitc-2021-004006 (PMC9413187; doi:10.1136/jitc-2021-004006), 2022-08-24
Supplement: jitc-2021-004006supp008.pdf [file jitc-2021-004006supp008.pdf]

**Table S1. The qPCR primer sequences and the shRNA knockdown sequences used in this study.**

| Human         | Forward                | Reverse                 |
|---------------|------------------------|-------------------------|
| <i>CCL5</i>   | Taqman: Hs00174575     | /                       |
| <i>CXCL10</i> | Taqman: Hs01124252     | /                       |
| <i>IFNB1</i>  | ATGACCAACAAGTGTCTCCTCC | GGAATCCAAGCAAGTTGTAGCTC |
| <i>RPL13A</i> | GCCATCGTGGCTAAACAGGTA  | GTTGGTGTTTCATCCGCTTGC   |
| <i>IFIT-1</i> | TCCTGGTGAGGAATAACAAGGG | GTCAGCCAGAACAGGTCGTC    |
| <i>IFIT-2</i> | AAGCACCTCAAAGGGCAAAAC  | TCGGCCCATGTGATAGTAGAC   |

| Mouse         | Forward               | Reverse                |
|---------------|-----------------------|------------------------|
| <i>Actb</i>   | GGCTGTATTCCCCTCCATCG  | CCAGTTGGTAACAATGCCATGT |
| <i>Ifn-b</i>  | CAGCTCCAAGAAAGGACGAA  | GGCAGTGTAACCTTTCTGCAT  |
| <i>Ccl5</i>   | GCTGCTTTGCCTACCTCTCC  | TCGAGTGACAAACACGACTGC  |
| <i>Cxcl10</i> | CCAAGTGCTGCCGTCATTTTC | GGCTCGCAGGGATGATTTCAA  |

| shRNA                | Sequence                |
|----------------------|-------------------------|
| <i>HIF1A</i> -shRNA1 | GCCGAGGAAGAAGCTATGAACA  |
| <i>HIF1A</i> -shRNA2 | GCATTGTATGTGTGAATTACG   |
| <i>cGAS</i> -shRNA   | CAACTACGACTAAAGCCATTTCT |
| <i>STING</i> -shRNA  | GCTGGCATGGTCATATTACATCT |
