# Supplementary material for: Hyperbaric oxygen facilitates teniposide-induced cGAS-STING activation to enhance the antitumor efficacy of PD-1 antibody in HCC
Source: PubMed Central journal article supplement — J Immunother Cancer. 2022 Aug 24;10(8):e004006. doi: 10.1136/jitc-2021-004006 (PMC9413187; doi:10.1136/jitc-2021-004006), 2022-08-24
Supplement: jitc-2021-004006supp009.pdf [file jitc-2021-004006supp009.pdf]

**Table S2. Univariate and multivariate analysis of prognostic factors for Disease-Free Survival and Overall Survival (n=120).**

| Variable                                            | Disease-Free Survival |         |                    |         | Overall Survival   |         |                    |         |
|-----------------------------------------------------|-----------------------|---------|--------------------|---------|--------------------|---------|--------------------|---------|
|                                                     | Univariate            |         | Multivariate       |         | Univariate         |         | Multivariate       |         |
|                                                     | HR<br>(95% CI)        | P value | HR<br>(95% CI)     | P value | HR<br>(95% CI)     | P value | HR<br>(95% CI)     | P value |
| Age (years), ≤50 vs >50                             | 0.805(0.489-1.324)    | 0.393   |                    |         | 1.125(0.539-2.348) | 0.754   |                    |         |
| Gender (male vs female)                             | 1.716(0.801-3.673)    | 0.165   |                    |         | 0.669(0.321-1.395) | 0.284   |                    |         |
| Tumor Multiplicity                                  |                       |         |                    |         |                    |         |                    |         |
| (multiple vs solitary)                              | 0.996(0.573-1.734)    | 0.989   |                    |         | 1.299(0.679-2.483) | 0.429   |                    |         |
| Tumor Size, cm (>5 vs ≤5)                           | 1.400(0.818-2.395)    | 0.219   |                    |         | 1.142(0.610-2.137) | 0.679   |                    |         |
| Tumor Differentiation                               |                       |         |                    |         |                    |         |                    |         |
| (III+IV vs I+II)                                    | 0.989(0.589-1.661)    | 0.967   |                    |         | 1.269(0.672-2.393) | 0.463   |                    |         |
| Tumor Microvascular                                 |                       |         |                    |         |                    |         |                    |         |
| invasion (yes vs no)                                | 0.670(0.376-1.193)    | 0.173   |                    |         | 0.671(0.341-1.321) | 0.248   |                    |         |
| TNM Stage (III+IV vs I+II)                          | 0.727(0.406-1.302)    | 0.283   |                    |         | 1.064(0.519-2.180) | 0.866   |                    |         |
| AFP (<400 vs ≥400)                                  | 1.561(0.925-2.635)    | 0.095   | 1.296(0.800-2.100) | 0.293   | 1.651(0.874-3.119) | 0.122   | 1.403(0.794-2.482) | 0.244   |
| HBV-DNA (<1*10 <sup>2</sup> vs ≥1*10 <sup>2</sup> ) | 0.856(0.530-1.381)    | 0.523   |                    |         | 0.925(0.522-1.637) | 0.788   |                    |         |
| p-IRF3                                              | 0.567(0.348-0.922)    | 0.022   | 0.572(0.364-0.899) | 0.016   | 0.438(0.236-0.810) | 0.008   | 0.497(0.285-0.864) | 0.013   |

AFP: alpha-fetoprotein; TNM: tumor, node, metastases; HBV: hepatitis B virus; HR: hazard ratio; CI: confidence interval
