# Supplementary material for: Hyperbaric oxygen facilitates teniposide-induced cGAS-STING activation to enhance the antitumor efficacy of PD-1 antibody in HCC
Source: PubMed Central journal article supplement — J Immunother Cancer. 2022 Aug 24;10(8):e004006. doi: 10.1136/jitc-2021-004006 (PMC9413187; doi:10.1136/jitc-2021-004006), 2022-08-24
Supplement: jitc-2021-004006supp010.pdf [file jitc-2021-004006supp010.pdf]

**Table S3. Patient demographics for clinical samples.**

| Patient No. | Age (Years) | Sex    | Tumor size (L×W, cm) |
|-------------|-------------|--------|----------------------|
| 1           | 67          | Male   | 5.0×4.5              |
| 2           | 43          | Male   | 6.7×4.7              |
| 3           | 39          | Female | 2.9×2.2              |
